# Supplementary material for: Association of TLR2 haplotypes encoding Q650 with reduced susceptibility to ovine Johne’s disease in Turkish sheep
Source: Sci Rep. 2021 Mar 29;11:7088. doi: 10.1038/s41598-021-86605-4 (PMC8007707; doi:10.1038/s41598-021-86605-4)
Supplement: Supplementary file 9 — Supplementary Table S9. [file 41598_2021_86605_MOESM9_ESM.xlsx]

## Sheet: Sheet1
Association of TLR2 haplotypes encoding Q650 with reduced susceptibility to ovine Johne’s disease in Turkish sheep Yalçın YAMAN, Ramazan AYMAZ, Murat KELEŞ, Veysel BAY, Cemal ÜN, Michael P. HEATON
Table S9. Historical attributes of 120 matched OJD case-control pairs.
Case-control pair ID	Birth Year	Breed	Animal ID	Age	OJD status	DNA status
1	2010	Bandirma	1119	8	Positive	Available
1	2010	Bandirma	1088	8	Negative	Available
2	2011	Bandirma	1087	7	Positive	Available
2	2011	Bandirma	1084	7	Negative	Available
3	2011	Bandirma	1182	7	Positive	Available
3	2011	Bandirma	1107	7	Negative	Available
4	2011	Bandirma	1205	7	Positive	Available
4	2011	Bandirma	1130	7	Negative	Available
5	2012	Bandirma	1166	6	Positive	Available
5	2012	Bandirma	1090	6	Negative	Available
6	2014	Bandirma	1118	4	Positive	Not available
6	2014	Bandirma	1194	4	Negative	Available
7	2014	Bandirma	1160	4	Positive	Available
7	2014	Bandirma	1203	4	Negative	Available
8	2014	Bandirma	1164	4	Positive	Available
8	2014	Bandirma	1249	4	Negative	Available
9	2014	Bandirma	1196	4	Positive	Not available
9	2014	Bandirma	1267	4	Negative	Available
10	2014	Bandirma	1256	4	Positive	Available
10	2014	Bandirma	1368	4	Negative	Available
11	2014	Bandirma	1358	4	Positive	Available
11	2014	Bandirma	1430	4	Negative	Available
12	2014	Bandirma	1396	4	Positive	Available
12	2013	Bandirma	1145	5	Negative	Available
13	2014	Bandirma	1414	4	Positive	Available
13	2013	Bandirma	1165	5	Negative	Available
14	2016	Bandirma	1207	2	Positive	Available
14	2016	Bandirma	1095	2	Negative	Available
15	2016	Bandirma	1397	2	Positive	Available
15	2016	Bandirma	1097	2	Negative	Not available
16	2013	Bandirma	1089	5	Positive	Available
16	2013	Bandirma	1101	5	Negative	Not available
17	2011	K. Merino	185	7	Positive	Available
17	2011	K. Merino	74	7	Negative	Available
18	2011	K. Merino	281	7	Positive	Available
18	2011	K. Merino	129	7	Negative	Available
19	2011	K. Merino	345	7	Positive	Available
19	2011	K. Merino	214	7	Negative	Available
20	2012	K. Merino	150	6	Positive	Not available
20	2012	K. Merino	36	6	Negative	Available
21	2012	K. Merino	154	6	Positive	Available
21	2012	K. Merino	70	6	Negative	Available
22	2012	K. Merino	184	6	Positive	Available
22	2012	K. Merino	112	6	Negative	Available
23	2012	K. Merino	552	6	Positive	Available
23	2012	K. Merino	142	6	Negative	Available
24	2012	K. Merino	634	6	Positive	Available
24	2012	K. Merino	175	6	Negative	Available
25	2013	K. Merino	5	5	Positive	Not available
25	2013	K. Merino	9	5	Negative	Available
26	2013	K. Merino	66	5	Positive	Available
26	2013	K. Merino	19	5	Negative	Available
27	2013	K. Merino	134	5	Positive	Available
27	2013	K. Merino	77	5	Negative	Not available
28	2013	K. Merino	203	5	Positive	Available
28	2013	K. Merino	87	5	Negative	Available
29	2013	K. Merino	206	5	Positive	Not available
29	2013	K. Merino	140	5	Negative	Available
30	2013	K. Merino	223	5	Positive	Not available
30	2013	K. Merino	143	5	Negative	Available
31	2013	K. Merino	272	5	Positive	Available
31	2013	K. Merino	164	5	Negative	Available
32	2013	K. Merino	296	5	Positive	Available
32	2013	K. Merino	232	5	Negative	Available
33	2013	K. Merino	307	5	Positive	Available
33	2013	K. Merino	256	5	Negative	Available
34	2013	K. Merino	341	5	Positive	Available
34	2013	K. Merino	276	5	Negative	Available
35	2013	K. Merino	365	5	Positive	Available
35	2013	K. Merino	282	5	Negative	Available
36	2013	K. Merino	477	5	Positive	Available
36	2013	K. Merino	367	5	Negative	Available
37	2013	K. Merino	530	5	Positive	Available
37	2013	K. Merino	397	5	Negative	Available
38	2013	K. Merino	531	5	Positive	Not available
38	2013	K. Merino	400	5	Negative	Not available
39	2013	K. Merino	551	5	Positive	Available
39	2013	K. Merino	405	5	Negative	Available
40	2013	K. Merino	564	5	Positive	Available
40	2013	K. Merino	421	5	Negative	Available
41	2014	K. Merino	163	4	Positive	Not available
41	2014	K. Merino	20	4	Negative	Not available
42	2014	K. Merino	219	4	Positive	Not available
42	2014	K. Merino	26	4	Negative	Not available
43	2014	K. Merino	239	4	Positive	Available
43	2014	K. Merino	32	4	Negative	Not available
44	2014	K. Merino	280	4	Positive	Available
44	2014	K. Merino	53	4	Negative	Not available
45	2014	K. Merino	353	4	Positive	Available
45	2014	K. Merino	202	4	Negative	Available
46	2014	K. Merino	355	4	Positive	Available
46	2014	K. Merino	226	4	Negative	Available
47	2014	K. Merino	396	4	Positive	Available
47	2014	K. Merino	326	4	Negative	Available
48	2014	K. Merino	401	4	Positive	Available
48	2014	K. Merino	373	4	Negative	Available
49	2014	K. Merino	449	4	Positive	Available
49	2014	K. Merino	392	4	Negative	Available
50	2014	K. Merino	504	4	Positive	Available
50	2014	K. Merino	409	4	Negative	Available
51	2014	K. Merino	544	4	Positive	Available
51	2014	K. Merino	437	4	Negative	Available
52	2014	K. Merino	573	4	Positive	Available
52	2014	K. Merino	459	4	Negative	Available
53	2014	K. Merino	576	4	Positive	Available
53	2014	K. Merino	466	4	Negative	Available
54	2014	K. Merino	637	4	Positive	Available
54	2014	K. Merino	469	4	Negative	Available
55	2015	K. Merino	96	3	Positive	Not available
55	2015	K. Merino	67	3	Negative	Available
56	2015	K. Merino	151	3	Positive	Available
56	2015	K. Merino	73	3	Negative	Available
57	2015	K. Merino	167	3	Positive	Available
57	2015	K. Merino	75	3	Negative	Available
58	2015	K. Merino	173	3	Positive	Available
58	2015	K. Merino	193	3	Negative	Available
59	2015	K. Merino	320	3	Positive	Available
59	2015	K. Merino	218	3	Negative	Available
60	2015	K. Merino	339	3	Positive	Available
60	2015	K. Merino	292	3	Negative	Available
61	2015	K. Merino	414	3	Positive	Available
61	2015	K. Merino	301	3	Negative	Available
62	2015	K. Merino	416	3	Positive	Available
62	2015	K. Merino	324	3	Negative	Available
63	2015	K. Merino	435	3	Positive	Available
63	2015	K. Merino	413	3	Negative	Available
64	2015	K. Merino	447	3	Positive	Available
64	2015	K. Merino	446	3	Negative	Available
65	2015	K. Merino	455	3	Positive	Available
65	2015	K. Merino	464	3	Negative	Available
66	2015	K. Merino	502	3	Positive	Available
66	2015	K. Merino	485	3	Negative	Available
67	2015	K. Merino	515	3	Positive	Available
67	2015	K. Merino	496	3	Negative	Available
68	2015	K. Merino	619	3	Positive	Not available
68	2015	K. Merino	524	3	Negative	Available
69	2015	K. Merino	644	3	Positive	Available
69	2015	K. Merino	558	3	Negative	Not available
70	2015	K. Merino	647	3	Positive	Available
70	2015	K. Merino	587	3	Negative	Available
71	2016	K. Merino	1487	2	Positive	Not available
71	2016	K. Merino	1498	2	Negative	Not available
72	2016	K. Merino	1504	2	Positive	Available
72	2016	K. Merino	1501	2	Negative	Not available
73	2016	K. Merino	1512	2	Positive	Available
73	2016	K. Merino	1508	2	Negative	Available
74	2016	K. Merino	1515	2	Positive	Available
74	2016	K. Merino	1516	2	Negative	Available
75	2016	K. Merino	1572	2	Positive	Available
75	2016	K. Merino	1521	2	Negative	Not available
76	2016	K. Merino	1574	2	Positive	Available
76	2016	K. Merino	1523	2	Negative	Available
77	2016	K. Merino	1589	2	Positive	Not available
77	2016	K. Merino	1527	2	Negative	Not available
78	2016	K. Merino	1644	2	Positive	Available
78	2016	K. Merino	1529	2	Negative	Available
79	2016	K. Merino	1664	2	Positive	Available
79	2016	K. Merino	1540	2	Negative	Not available
80	2016	K. Merino	1680	2	Positive	Not available
80	2016	K. Merino	1542	2	Negative	Not available
81	2016	K. Merino	1599	2	Positive	Not available
81	2016	K. Merino	669	2	Negative	Available
82	2012	Kivircik	736	6	Positive	Not available
82	2012	Kivircik	698	6	Negative	Not available
83	2012	Kivircik	867	6	Positive	Available
83	2012	Kivircik	762	6	Negative	Available
84	2013	Kivircik	714	5	Positive	Available
84	2013	Kivircik	710	5	Negative	Available
85	2013	Kivircik	740	5	Positive	Not available
85	2013	Kivircik	720	5	Negative	Not available
86	2013	Kivircik	744	5	Positive	Available
86	2013	Kivircik	723	5	Negative	Available
87	2013	Kivircik	779	5	Positive	Available
87	2013	Kivircik	727	5	Negative	Available
88	2013	Kivircik	924	5	Positive	Available
88	2013	Kivircik	738	5	Negative	Available
89	2014	Kivircik	812	4	Positive	Available
89	2014	Kivircik	692	4	Negative	Available
90	2014	Kivircik	912	4	Positive	Available
90	2014	Kivircik	838	4	Negative	Available
91	2015	Kivircik	792	3	Positive	Available
91	2015	Kivircik	726	3	Negative	Available
92	2016	Kivircik	854	2	Positive	Not available
92	2015	Kivircik	737	3	Negative	Not available
93	2016	Kivircik	885	2	Positive	Available
93	2015	Kivircik	918	3	Negative	Available
94	2016	Kivircik	Prj-155	2	Positive	Available
94	2015	Kivircik	Prj-153	3	Negative	Available
95	2016	Kivircik	Prj-137	2	Positive	Available
95	2015	Kivircik	Prj-135	3	Negative	Available
96	2011	Imroz	760	7	Positive	Available
96	2011	Imroz	686	7	Negative	Available
97	2016	Imroz	996	2	Positive	Available
97	2015	Imroz	882	3	Negative	Available
98	2014	Chios	s465	4	Positive	Available
98	2014	Chios	s483	4	Negative	Available
99	2014	Chios	s479	4	Positive	Available
99	2014	Chios	s467	4	Negative	Available
100	2014	Chios	s462	4	Positive	Available
100	2014	Chios	s492	4	Negative	Available
101	2014	Chios	s478	4	Positive	Available
101	2014	Chios	s490	4	Negative	Available
102	2009	Chios	s454	9	Positive	Available
102	2009	Chios	s486	9	Negative	Available
103	2015	Chios	s498	3	Positive	Available
103	2015	Chios	s485	3	Negative	Available
104	2015	Chios	s477	3	Positive	Available
104	2015	Chios	s472	3	Negative	Available
105	2015	Chios	s460	3	Positive	Available
105	2015	Chios	s487	3	Negative	Available
106	2007	Chios	s451	11	Positive	Available
106	2007	Chios	s463	11	Negative	Available
107	2014	Chios	s484	4	Positive	Available
107	2013	Chios	s474	5	Negative	Available
108	2014	Chios	s453	4	Positive	Available
108	2013	Chios	s488	5	Negative	Available
109	na	Awassi	Prj-783	na	Positive	Available
109	na	Awassi	Prj-800	na	Negative	Available
110	na	Awassi	Prj-791	na	Positive	Available
110	na	Awassi	Prj-804	na	Negative	Available
111	na	Awassi	Prj-814	na	Positive	Available
111	na	Awassi	Prj-808	na	Negative	Available
112	na	Awassi	Prj-820	na	Positive	Available
112	na	Awassi	Prj-815	na	Negative	Available
113	na	Awassi	Prj-850	na	Positive	Available
113	na	Awassi	Prj-835	na	Negative	Available
114	na	Awassi	Prj-861	na	Positive	Available
114	na	Awassi	Prj-837	na	Negative	Available
115	na	Awassi	Prj-864	na	Positive	Available
115	na	Awassi	Prj-859	na	Negative	Available
116	na	Awassi	Prj-885	na	Positive	Available
116	na	Awassi	Prj-860	na	Negative	Available
117	na	Awassi	Prj-793	na	Positive	Available
117	na	Awassi	Prj-788	na	Negative	Available
118	na	Awassi	Prj-865	na	Positive	Available
118	na	Awassi	Prj-866	na	Negative	Available
119	na	Karakacan	Prj-26	na	Positive	Available
119	na	Karakacan	Prj-108	na	Negative	Available
120	na	Karakacan	Prj-81	na	Positive	Available
120	na	Karakacan	Prj-89	na	Negative	Available
